# Supplementary material
Source: PubMed Central journal article supplement (PMC3784653)
Supplement: NIHMS509687-supplement-1_si_001.pdf [file NIHMS509687-supplement-1_si_001.pdf]

**Supporting Information for:**

**Epithelial-Mesenchymal Transition Enhances Nano-scale Actin Filament Dynamics  
of Ovarian Cancer Cells**

*Sunyoung Lee<sup>1†</sup>, Yang Yang<sup>2†</sup>, David Fishman<sup>3</sup>, Mark M. Banaszak Holl<sup>4</sup>, and  
Seungpyo Hong<sup>\*2</sup>*

<sup>1</sup>Elmhurst Hospital Center, Icahn School of Medicine at Mount Sinai, Elmhurst, NY 11373

<sup>2</sup>Department of Biopharmaceutical Sciences, University of Illinois, Chicago, IL 60612

<sup>3</sup>Department of Obstetrics, Gynecology, and Reproductive Science, Icahn School of  
Medicine at Mount Sinai, New York, NY 10029

<sup>4</sup>Department of Chemistry, University of Michigan, Ann Arbor, MI 48109

<sup>†</sup>Both authors contributed equally to this work.

\*All correspondence should be addressed to:

Prof. Seungpyo Hong, Ph.D.  
Department of Biopharmaceutical Sciences  
College of Pharmacy  
The University of Illinois at Chicago  
833 S. Wood St. Rm 335  
Chicago, IL 60612  
Phone: 312-413-8294  
Fax: 312-996-0098  
E-mail: [sphong@uic.edu](mailto:sphong@uic.edu)

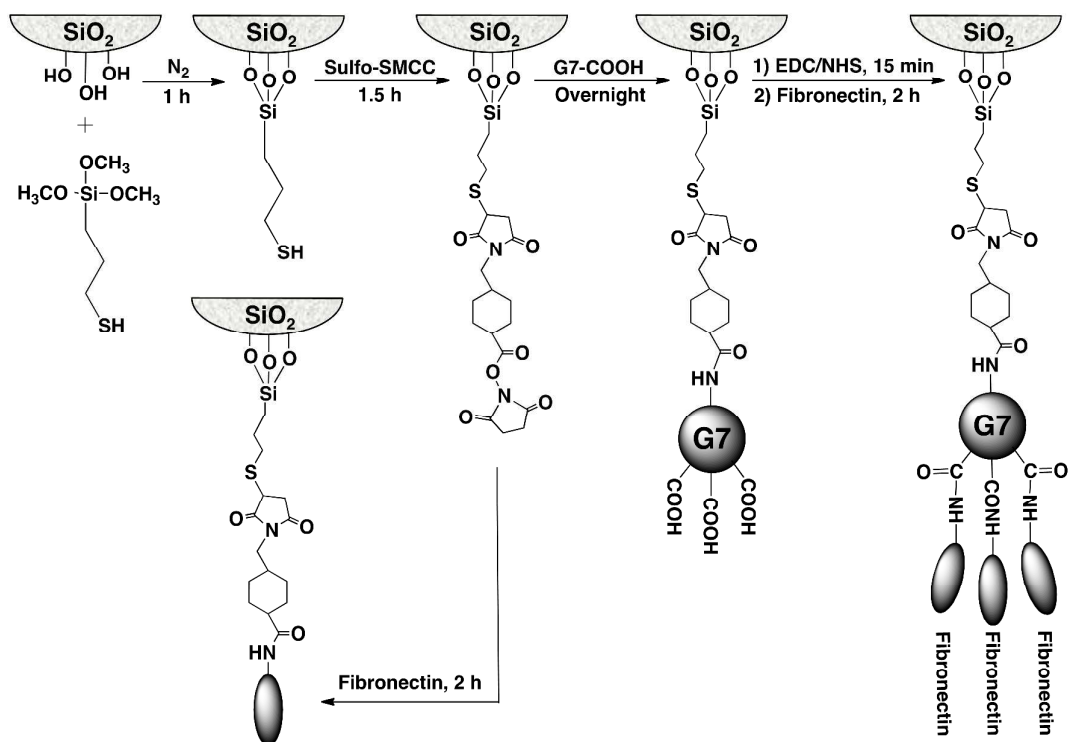

**Figure S1.** Schematic of AFM probe modification. Spherical silicon oxide probe cantilevers (diameter = 5  $\mu\text{m}$ ) were washed in absolute ethanol and treated with 3-mercaptopropyl trimethoxysilane (4% v/v in absolute ethanol) for 1 h, and rinsed with ethanol. The cantilevers were further incubated in ddH<sub>2</sub>O containing sulfo-SMCC (2 mM) for 1.5 h. Sulfo-SMCC was replaced with G7-dendrimers overnight (0.5 mg/mL, 90% surface carboxylation), followed by incubation with EDC (100  $\mu\text{M}$ ) and NHS (100  $\mu\text{M}$ ) for 15 min to activate the surface carboxyl groups. Fibronectin (1 mg/mL) was incubated with cantilevers for 2 h. After rinsing the cantilevers with phosphate buffered saline (PBS), they were ready for imaging. AFM, atomic force microscopy.

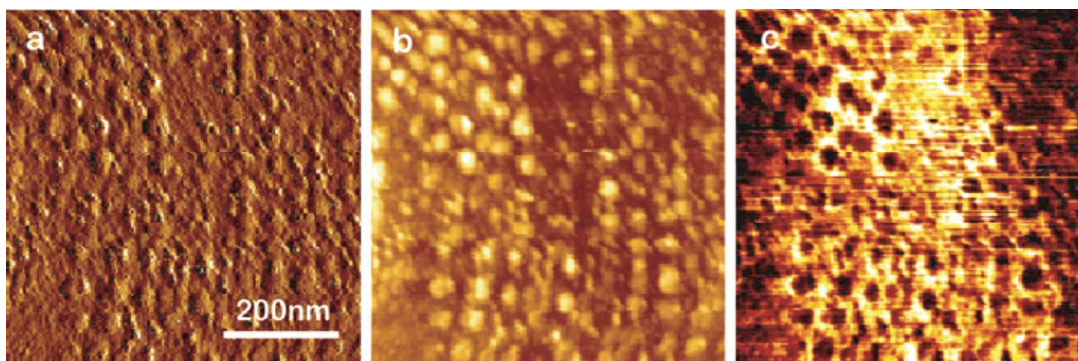

**Figure S2.** AFM images of fibronectin (FN) conjugated on a surface of a spherical AFM probe. An FN-conjugated spherical AFM probe surface was imaged using an anti-FN antibody-immobilized AFM tip via nano-scale dynamic recognition imaging using a method published elsewhere<sup>1</sup>: **(a)** An amplitude image; **(b)** A topography image; and **(c)** A recognition image. Dark spots in the recognition image represent specific interaction events between anti-FN antibody on the AFM tip and FN molecules conjugated on the probe surface. The size of image is 600 nm x 600 nm (0.36  $\mu\text{m}^2$ ). Scale bar: 200 nm.

*Experimental Description:* Direct imaging of FN conjugated on the probe surface was performed in AFM MAC mode. Anti-FN antibody was immobilized on the sharp AFM cantilever (Applied NanoStructures, Inc., Santa Clara, CA) according to literature.<sup>2</sup> Imaging analysis of a given probe area was performed to count the number of FN conjugated on the surface of spherical AFM surface. Dark spots in **Figure S2** counted were at least an order of magnitude darker than background threshold ( $n = 6$ ).

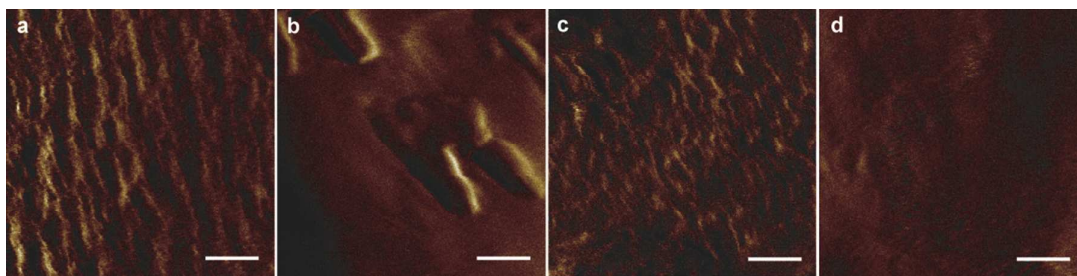

**Figure S3.** RMS roughness and AFM imaging of probe surfaces with ultra-sharp cantilevers in AC mode AFM. Amplitude images of a bare AFM probe surface (**a**, RMS roughness = 14.49 nm), an SMCC-FN-conjugated AFM probe surface (**b**, RMS roughness = 8.99 nm), a G7 dendrimer-conjugated AFM probe surface (**c**, RMS roughness = 11.71 nm), and G7 dendrimer-FN-conjugated AFM probe surface (**d**, RMS roughness = 5.91 nm). Scale bar = 200 nm.

*Experimental Description:* The AC mode AFM imaging was performed for the RMS roughness measurement of the various AFM cantilever surfaces (**Figure S3**). The unmodified, G7 dendrimer-conjugated, SMCC-FN conjugated, and G7-FN conjugated probes were placed in PBS (400  $\mu$ L) and imaged in the AFM AC mode with ultra-sharp AFM cantilevers (Applied NanoStructures, Inc., Santa Clara, CA) whose resonance frequency was calibrated prior to imaging. The rate of AC mode imaging was 0.4 lines/sec (400 nm/sec) with  $512 \times 512$  pixels.

## References

1. Chtcheglova, L. A.; Waschke, J.; Wildling, L.; Drenckhahn, D.; Hinterdorfer, P. Nano-Scale Dynamic Recognition Imaging on Vascular Endothelial Cells. *Biophys. J.* **2007**, *93*, L11-L13.
2. Lee, S.; Mandic, J.; Van Vliet, K. J. Chemomechanical Mapping of Ligand-Receptor Binding Kinetics on Cells. *Proc. Natl. Acad. Sci. U.S.A.* **2007**, *104*, 9609-9614.
